# Supplementary material for: Metabolic control of regulatory T cell stability and function by TRAF3IP3 at the lysosome
Source: PubMed Central journal article supplement — J Exp Med. 2018 Sep 3;215(9):2463–76. doi: 10.1084/jem.20180397 (PMC6122976; doi:10.1084/jem.20180397), 2018-09-03
Supplement: JEM_20180397_sm.pdf [file JEM_20180397_sm.pdf]

Supplemental material

Yu et al., <https://doi.org/10.1084/jem.20180397>

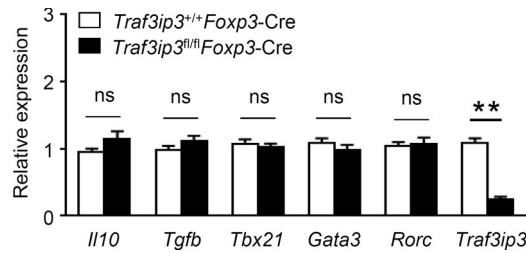

Figure S1. **Expressions of T reg cell related genes in *Traf3ip3*<sup>+/+</sup> *Foxp3-Cre* and *Traf3ip3*<sup>fl/fl</sup> *Foxp3-Cre* T reg cells.** Splenic T reg cells from 8-wk-old *Traf3ip3*<sup>+/+</sup> *Foxp3-Cre* and *Traf3ip3*<sup>fl/fl</sup> *Foxp3-Cre* mice were isolated for quantitative RT-PCR analysis. Data are representative of at least three independent experiments and are presented as mean ± SEM. ns, not statistically significant; \*\*, P < 0.01. Student's *t* test.

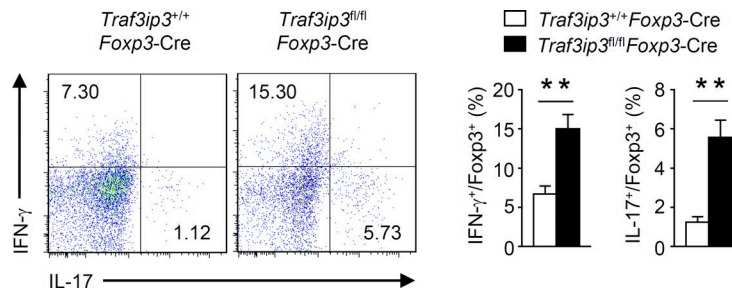

Figure S2. **Cytokine expression of gut T reg cells.** Flow cytometric analysis of IFN-γ and IL-17 expression in gut T reg cells from 8-wk-old *Traf3ip3*<sup>+/+</sup> *Foxp3-Cre* and *Traf3ip3*<sup>fl/fl</sup> *Foxp3-Cre* mice stimulated for 24 h with antibodies against CD3 and CD28. Data are representative of three independent experiments and are presented as mean ± SEM. \*\*, P < 0.01. Student's *t* test.

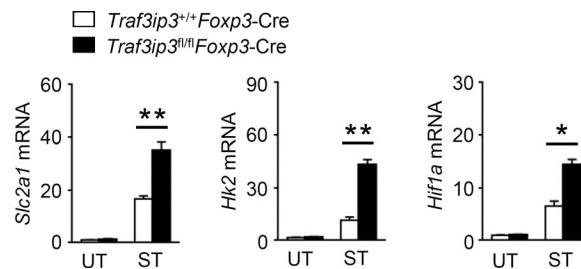

Figure S3. **Expressions of metabolism related genes in *Traf3ip3*<sup>+/+</sup> *Foxp3-Cre* and *Traf3ip3*<sup>fl/fl</sup> *Foxp3-Cre* T reg cells.** Splenic *Traf3ip3*<sup>+/+</sup> *Foxp3-Cre* and *Traf3ip3*<sup>fl/fl</sup> *Foxp3-Cre* T reg cells were stimulated for 0 (unstimulated; UT) or 24 h (stimulated; ST) with antibodies against CD3 and CD28 following quantitative RT-PCR analysis of glucose transporter GLUT1 (murine gene name *Slc2a1*), glycolytic enzyme hexokinase 2 and metabolic master regulator HIF1-α expression. Data are representative of three independent experiments and are presented as mean ± SEM. \*, P < 0.05; \*\*, P < 0.01. Student's *t* test.
